# Supplementary material for: Synthesis and structure/properties characterizations of four polyurethane model hard segments
Source: R Soc Open Sci. 2018 Jul 25;5(7):180536. doi: 10.1098/rsos.180536 (PMC6083698; doi:10.1098/rsos.180536)
Supplement: Supplementary material [file rsos180536supp1.doc]

**Supplementary material**

Lei Jiang1,2, Zhiyong Ren2*, Wei Zhao2, Wentao Liu1, Hao Liu1, Chenshen Zhu1*

1School of Materials Science and Engineering, Zhengzhou University, Zhengzhou, China

2High & New Technology Research Center of Henan Academy of Sciences, Zhengzhou, China

*Correspondent authors: Email: *zyren23@yahoo.com, zhucs@zzu.edu.cn

**1. HRMS analysis**


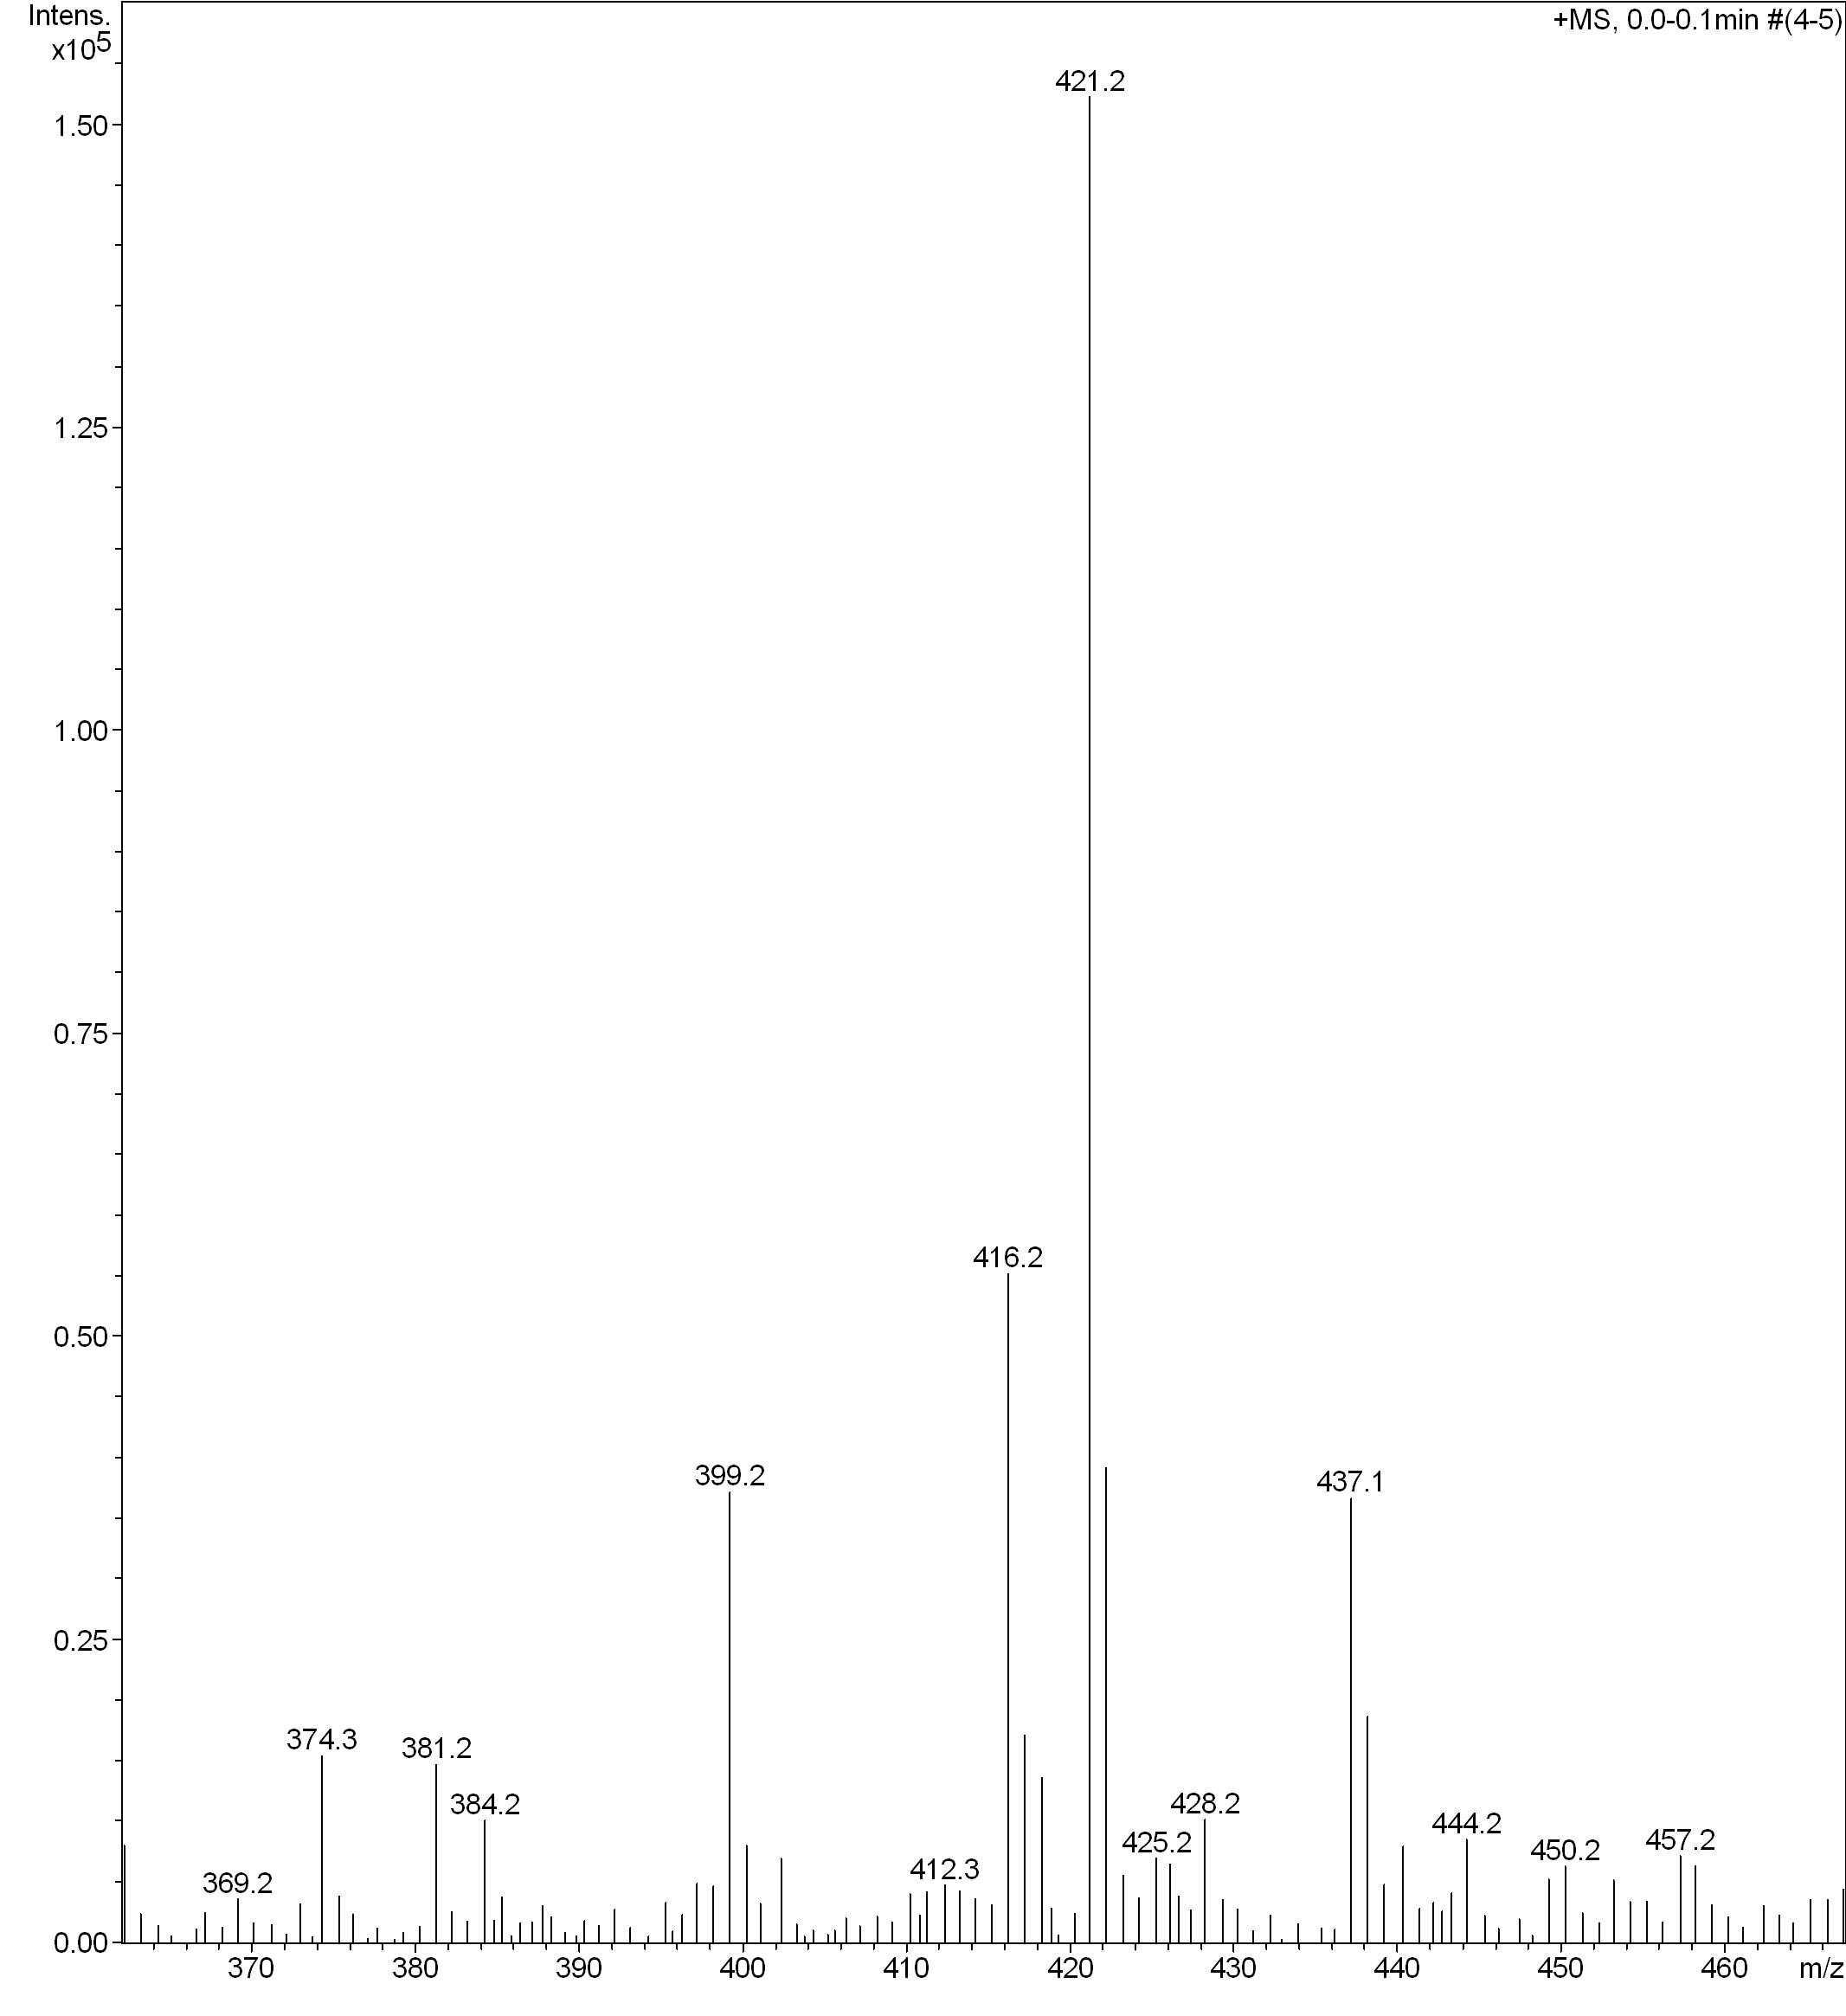


**Figure S1. HRMS spectra of 4,4-MDI_BO**

In Figure S1, the molecular weight of [M + H]+, [M + Na]+ and [M + K]+ of 4,4-MDI_BO are 399, 421 and 437, respectively.


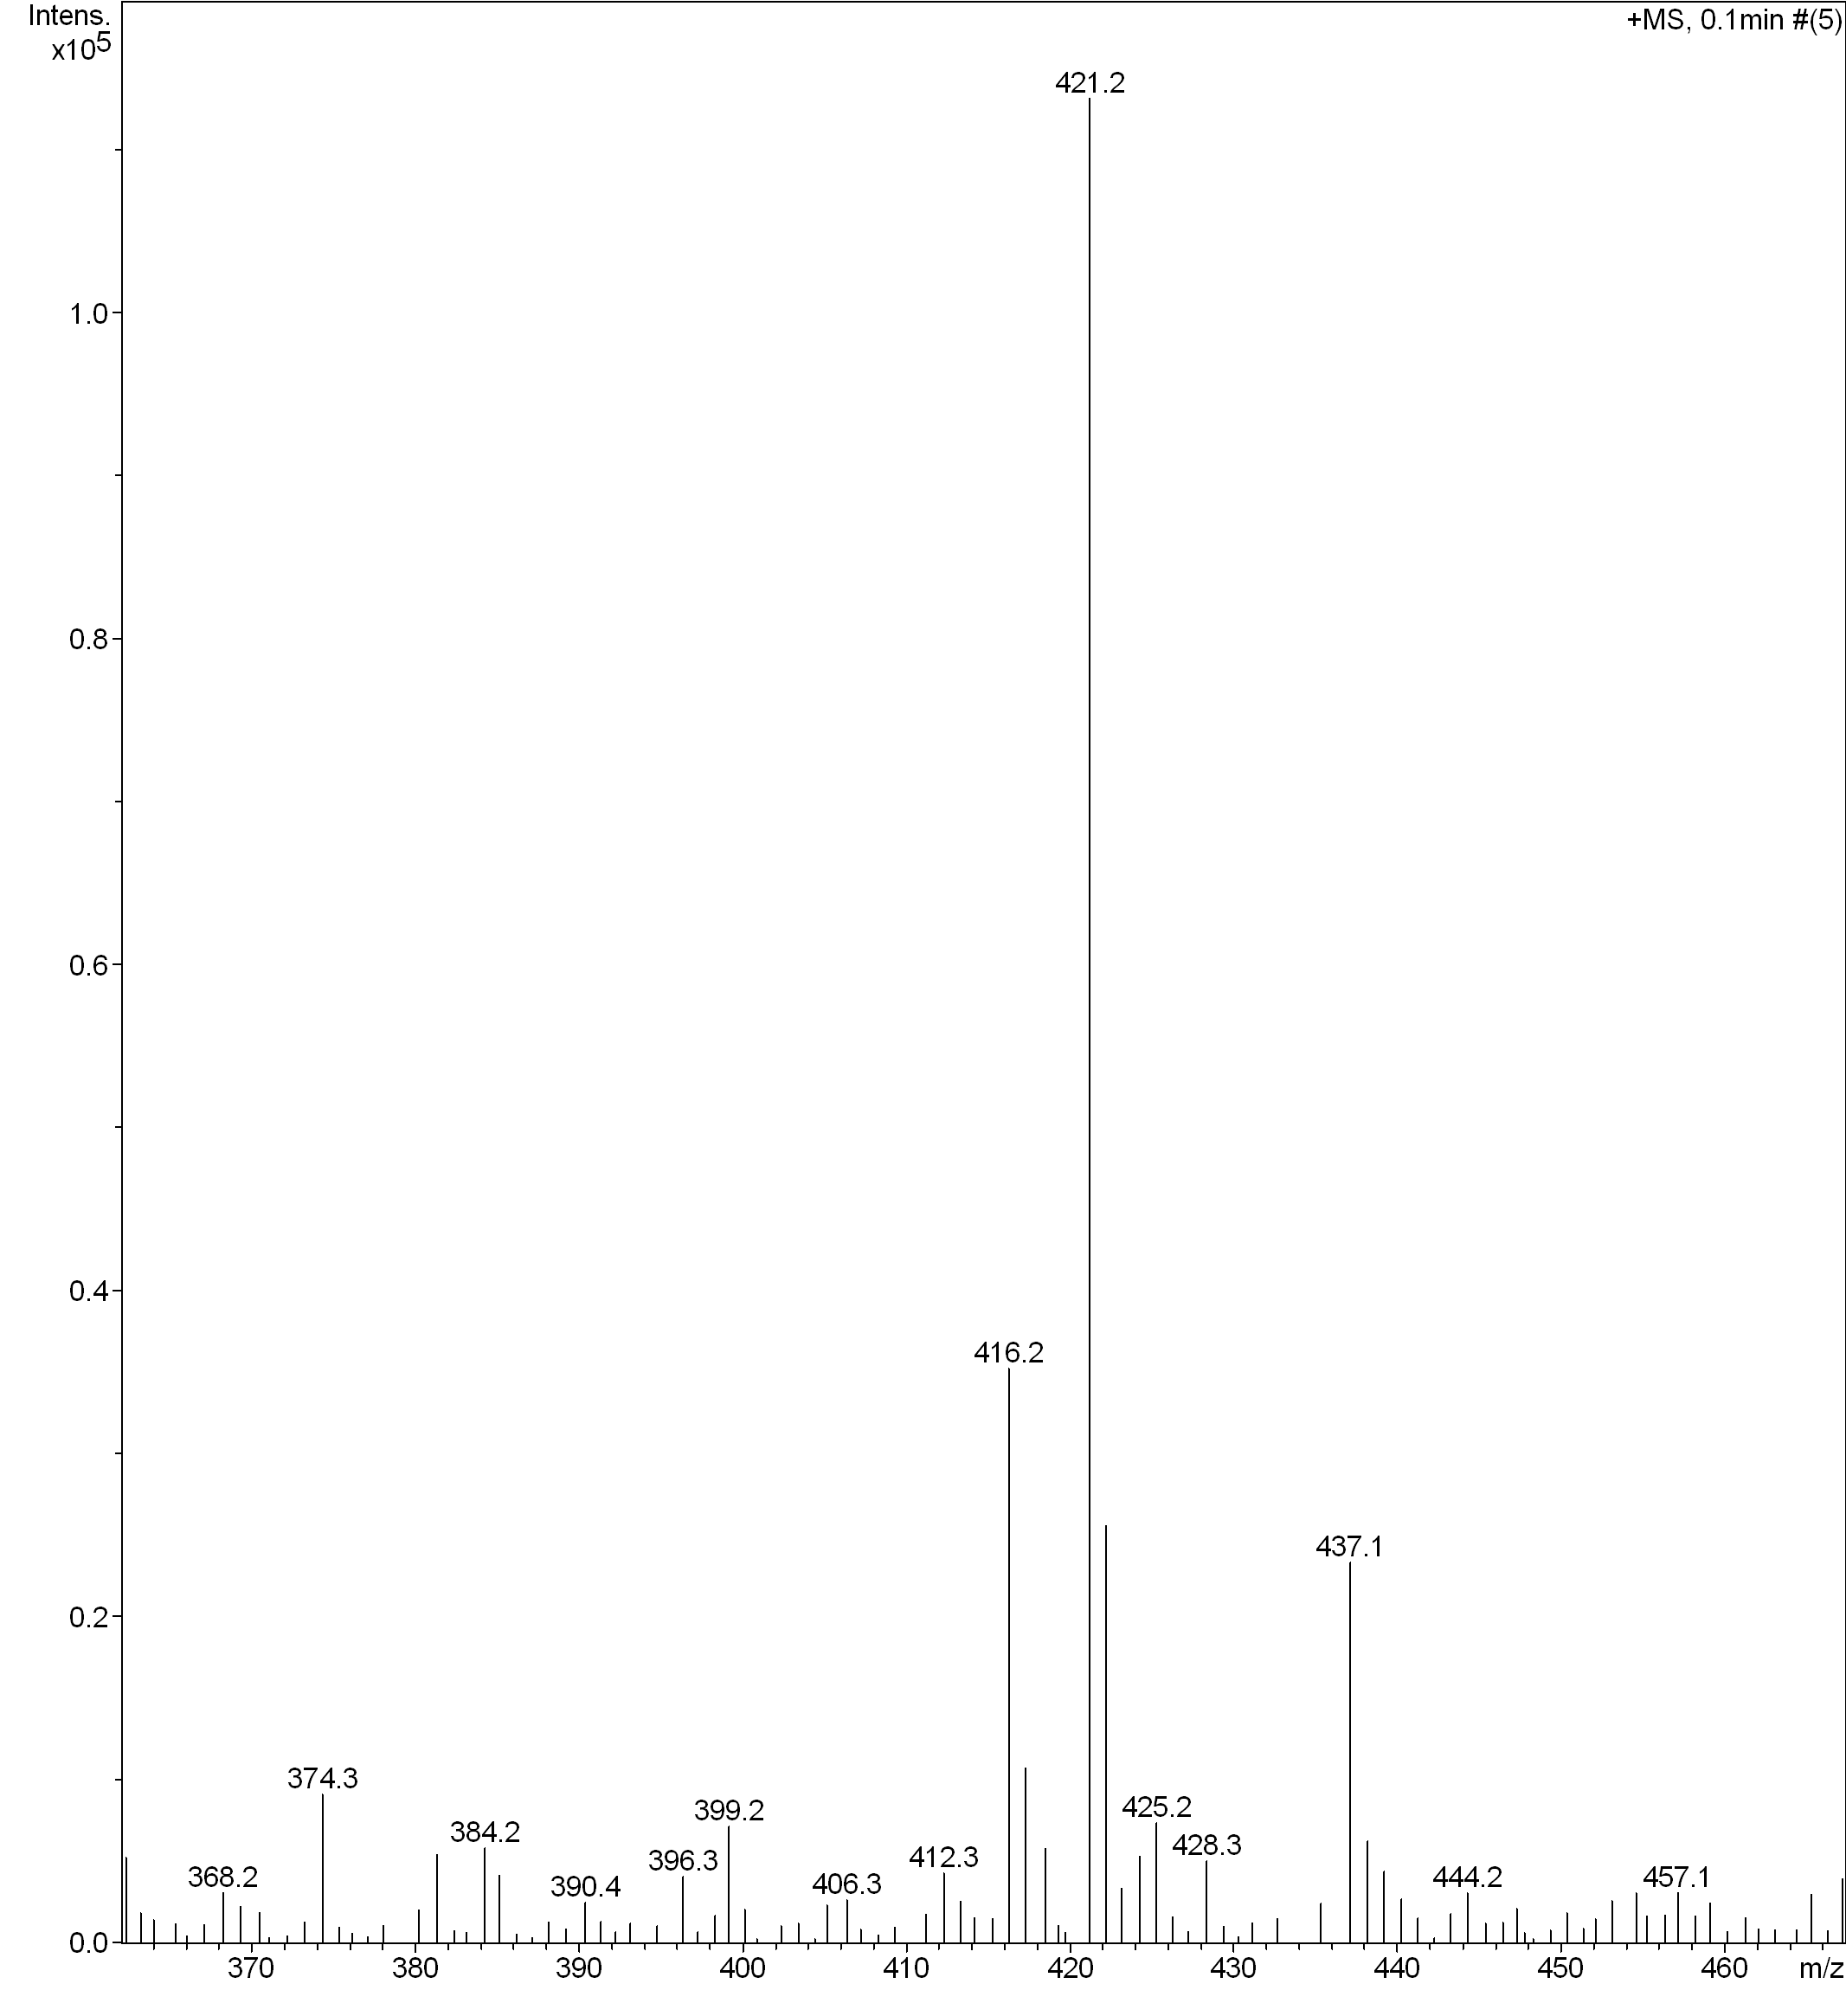


**Figure S2. HRMS spectra of MDI-50_BO**

In Figure S2, the molecular weight of [M + H]+, [M + Na]+ and [M + K]+ of MDI-50_BO are 399, 421 and 437, respectively, in which the molecular weight of 2,4-MDI_BO is the same as 4,4-MDI_BO, since they do have the same molecular weight, only 2,4-MDI in MDI-50 is another isomer of 4,4-MDI.


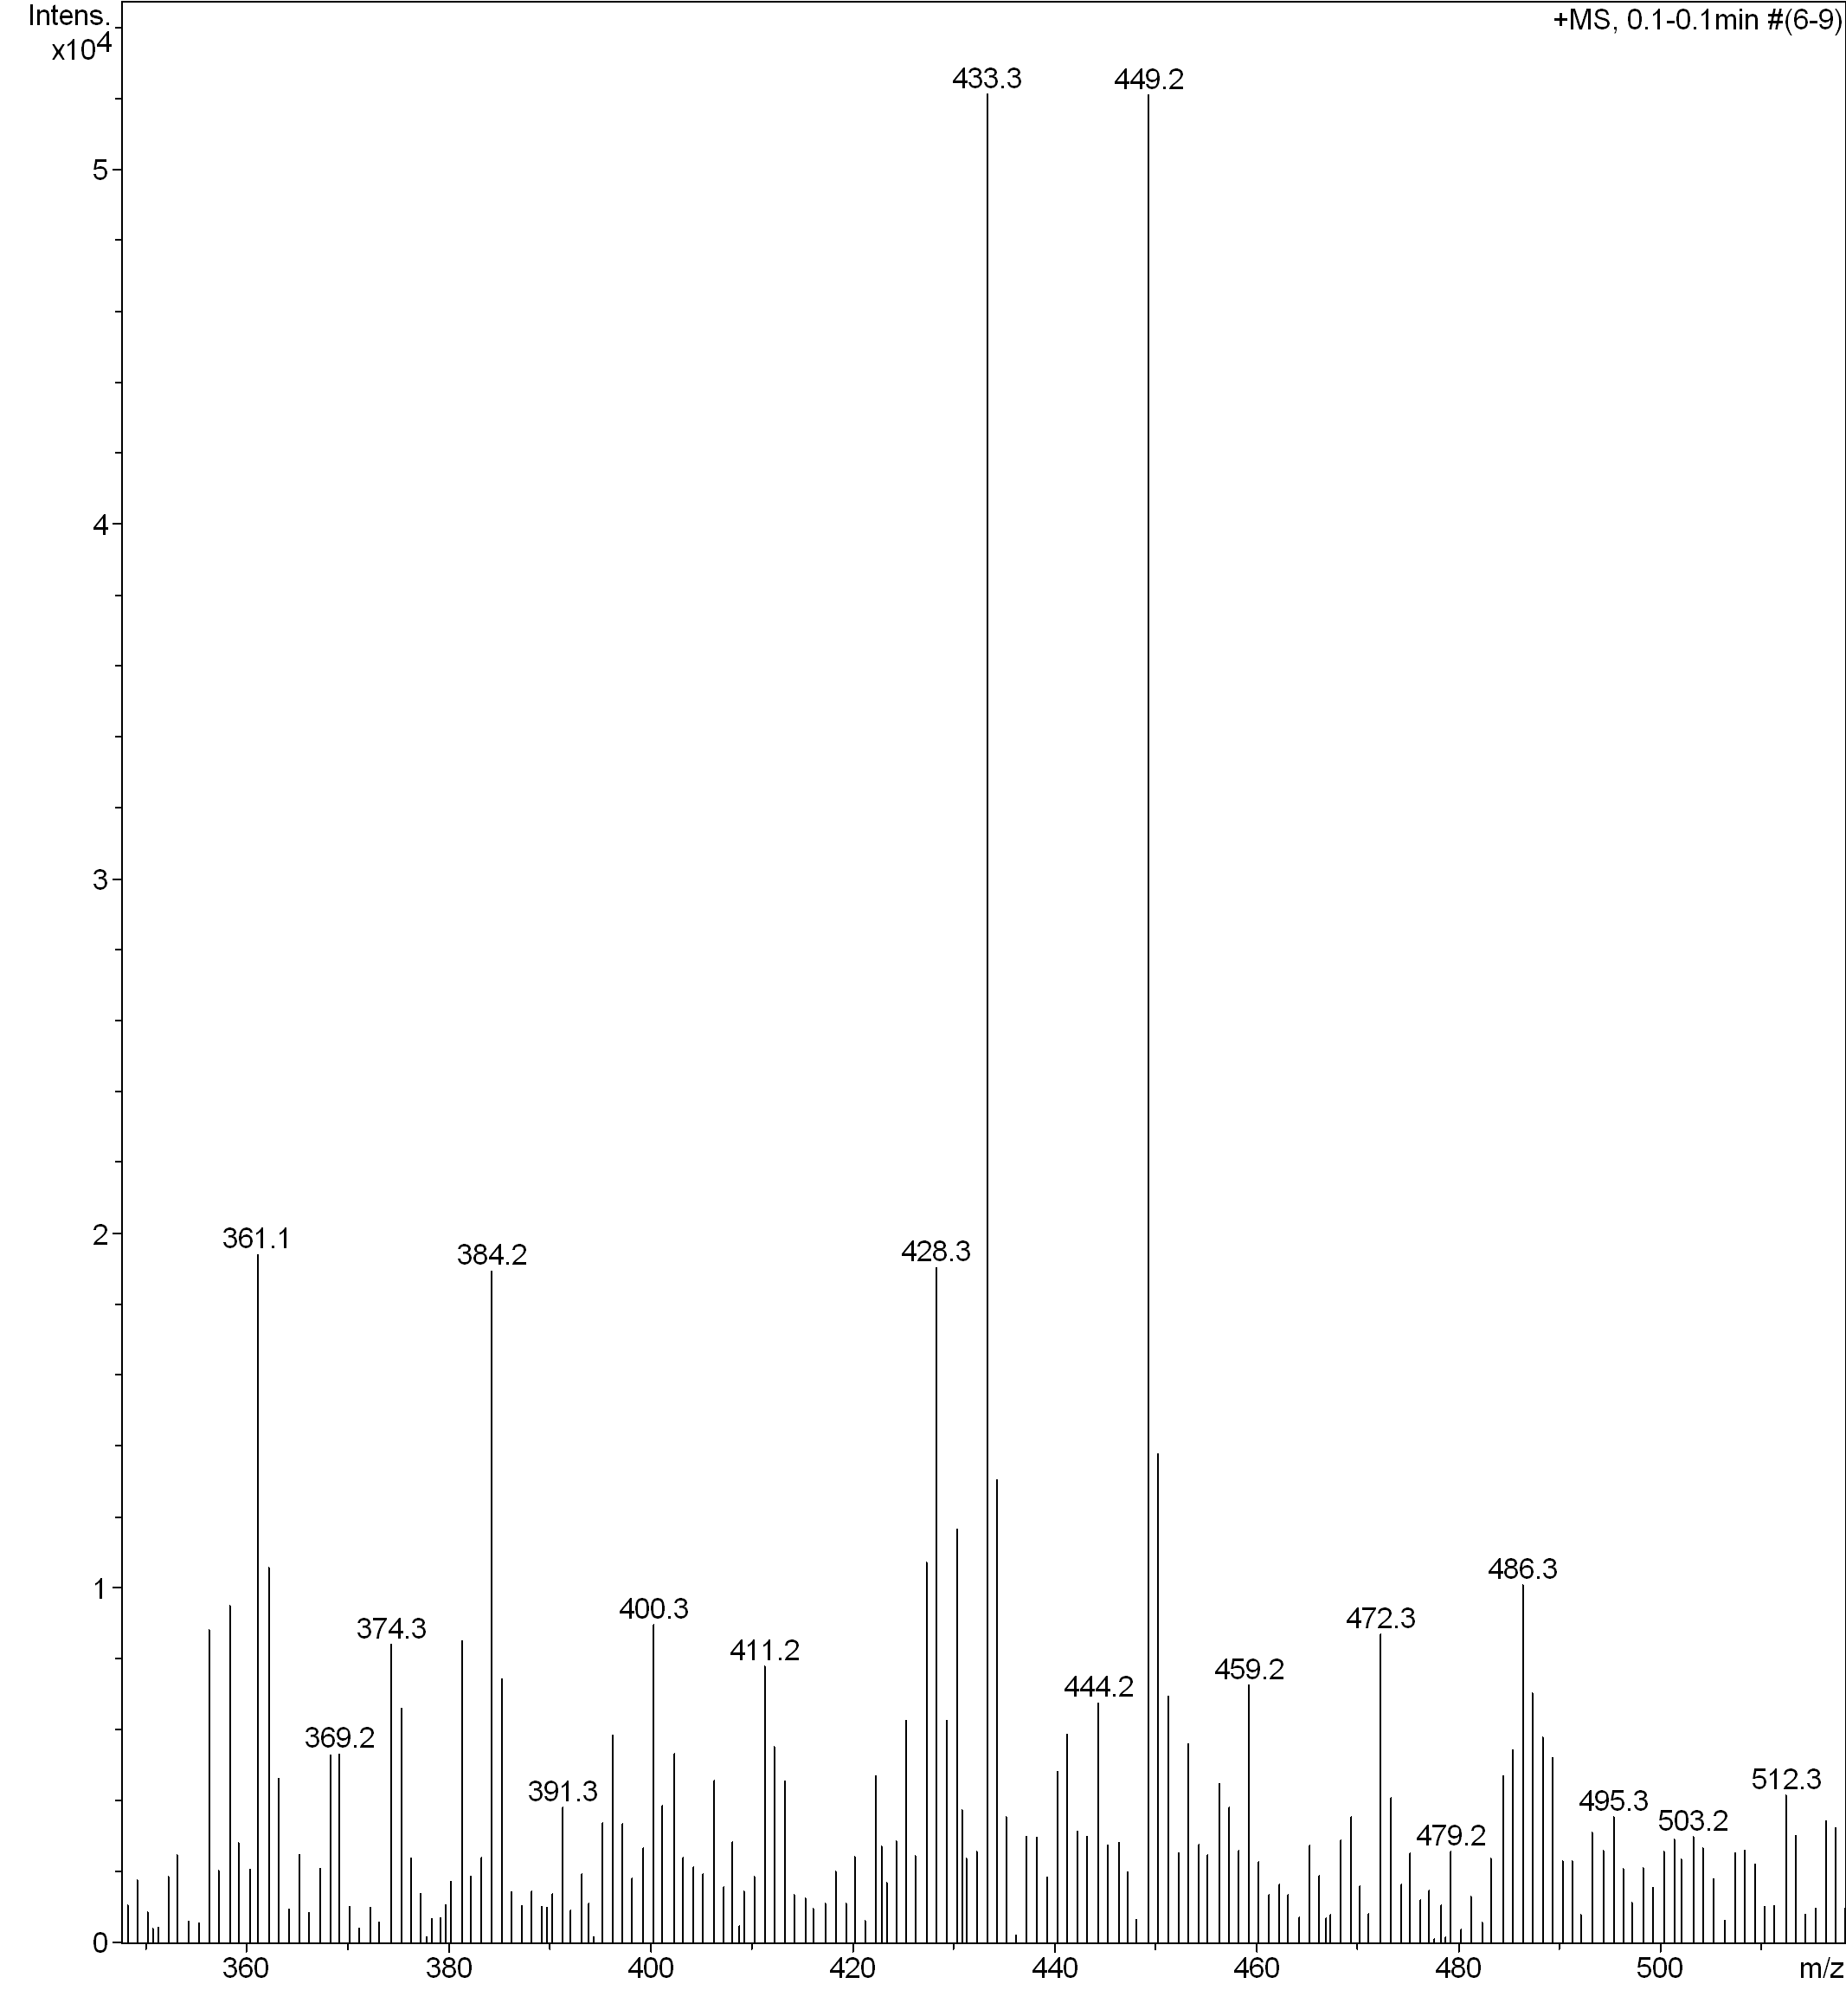


**Figure S3. HRMS spectra of HMDI_BO**

In Figure S3, the molecular weight of [M + H]+, [M + Na]+ and [M + K]+ of HMDI_BO are 411, 433 and 449, respectively.


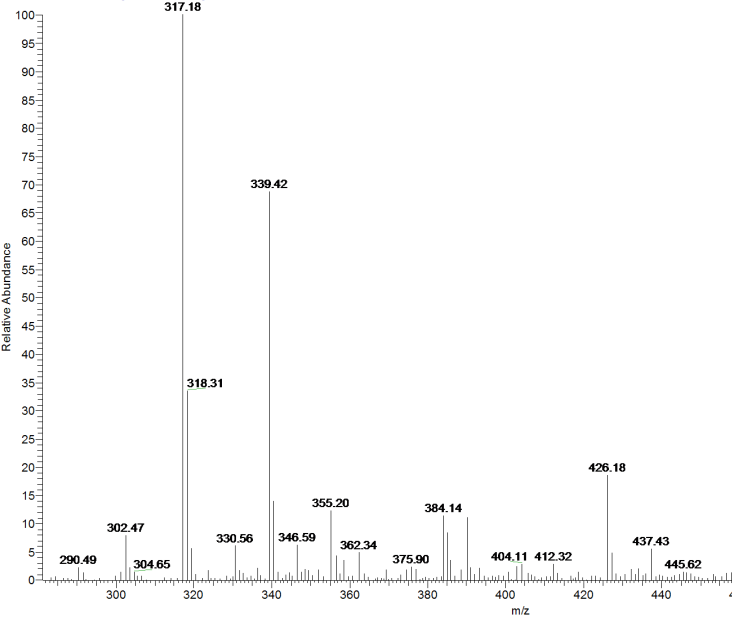


**Figure S4. HRMS spectra of HDI_BO**

In Figure S4, the molecular weight of [M + H]+ and [M + Na]+ of HDI_BO are 317 and 339, respectively.

**2. NMR analysis**

**1) 13C and 1H NMR spectra of 4,4-MDI_BO**

**
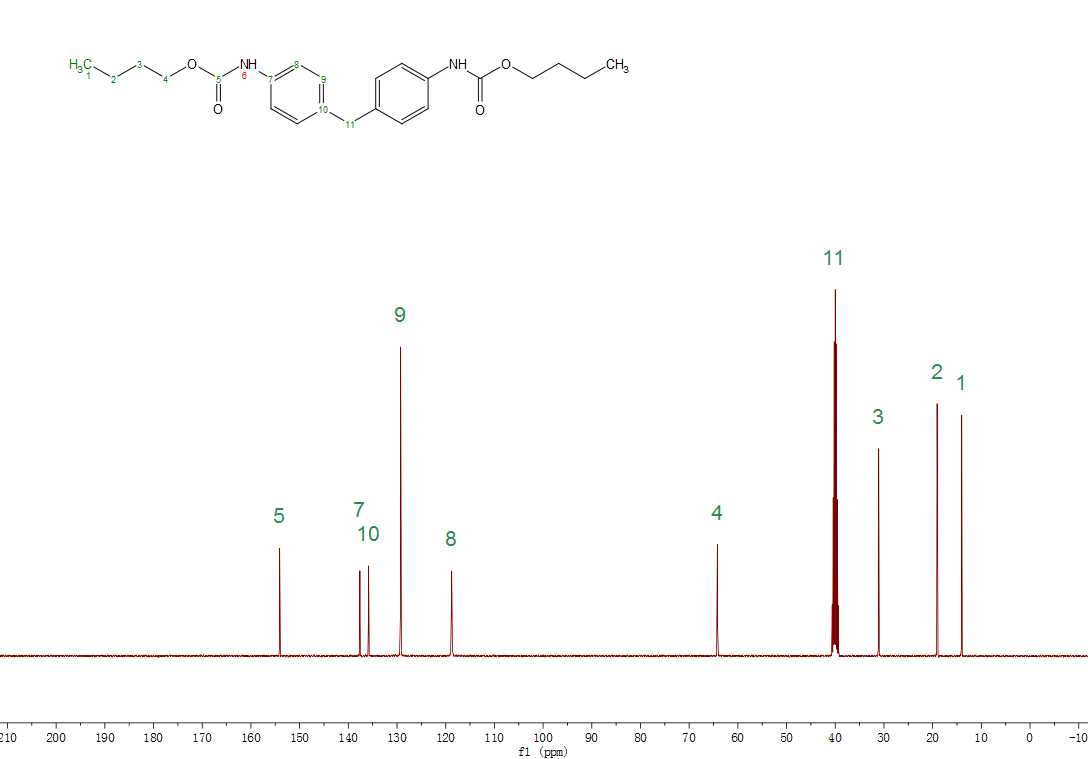
**

**Figure S5. 13C NMR spectrum of 4,4-MDI_BO**

**
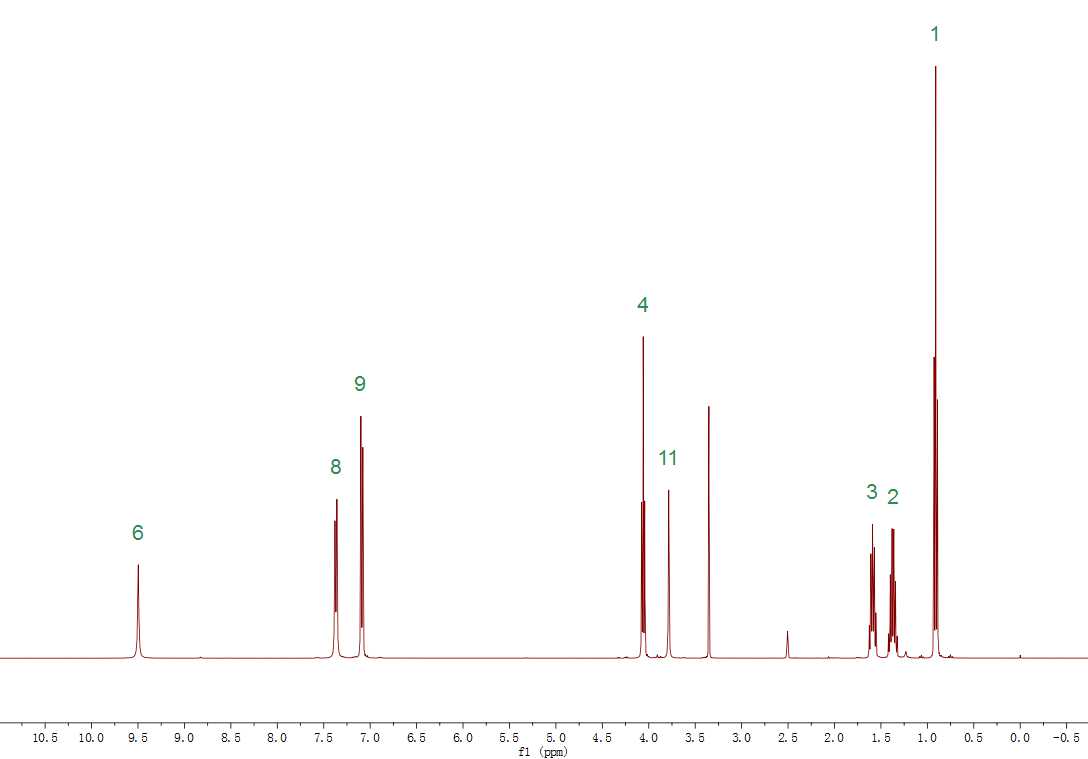
**

**Figure S6. 1HNMR spectrum of 4,4-MDI_BO**

According to the structure (Figure 1) of the synthesized 4,4-MDIBO, the product has symmetrical structure, so there should be 8 groups of hydrogen peaks and 10 bars of carbon peaks in 1H and 13C NMR spectra, respectively.

In the 13C NMR spectrum (Figure S5), the peak at δC14.04 was attributes to the methyl carbon(C-1). The two peaks at δC19.08 and δC31.08 were assigned to two methylene carbons (C-2 and C-3), respectively. The peak at δC19.08 belongs to C-2 and the peak at δC31.08 belongs to C-3. The peak at δC40.28 belongs to the methylene carbon (C-11) which is between the benzene rings. The peak at δC64.21 belongs to the methylene carbon (C-4) which  connects to oxygen. The peaks at δC129.26, δC135.85, δC118.79 and δC137.62 belong to the four carbons on the benzene ring (C-7, C-8, C-9 and C-10), whose chemical shifts can be confirmed by the calculation of theoretical formula. And the peak at δC154.12 belongs to the carbonyl carbon(C-5).

In the 1H NMR spectrum (Figure S6), the triplet peaks at δH0.92 were attributed to methyl (H-1). The two multiple peaks at δH1.37 and δH1.6 were assigned to two methylenes (H-2 and H-3), respectively. The peak at δH1.37 belongs to H-2 and the peak at δH1.6 belongs to H-3. The single peak at δH3.79 belongs to the methylene (H-11) which is between the two benzene rings. The triplet peaks at δH4.06 belong to the methylene (H-4) which connects to oxygen. The two doublets at δH7.09 and δH7.37 belong to the two hydrogen atoms in the benzene ring (H-8 and H-9), respectively, whose chemical shifts can be calculated by theoretical formula. According to calculated result, H-9 is located in the high magnetic field and H-8 is located in the low magnetic field. The single peak at δH9.50 belongs to the hydrogen attached to nitrogen atom. All NMR analytical data of 4,4-MDIBO are listed in Table 3 in the formal text.

**2) 13C and 1H NMR spectra of MDI-50_BO**

**
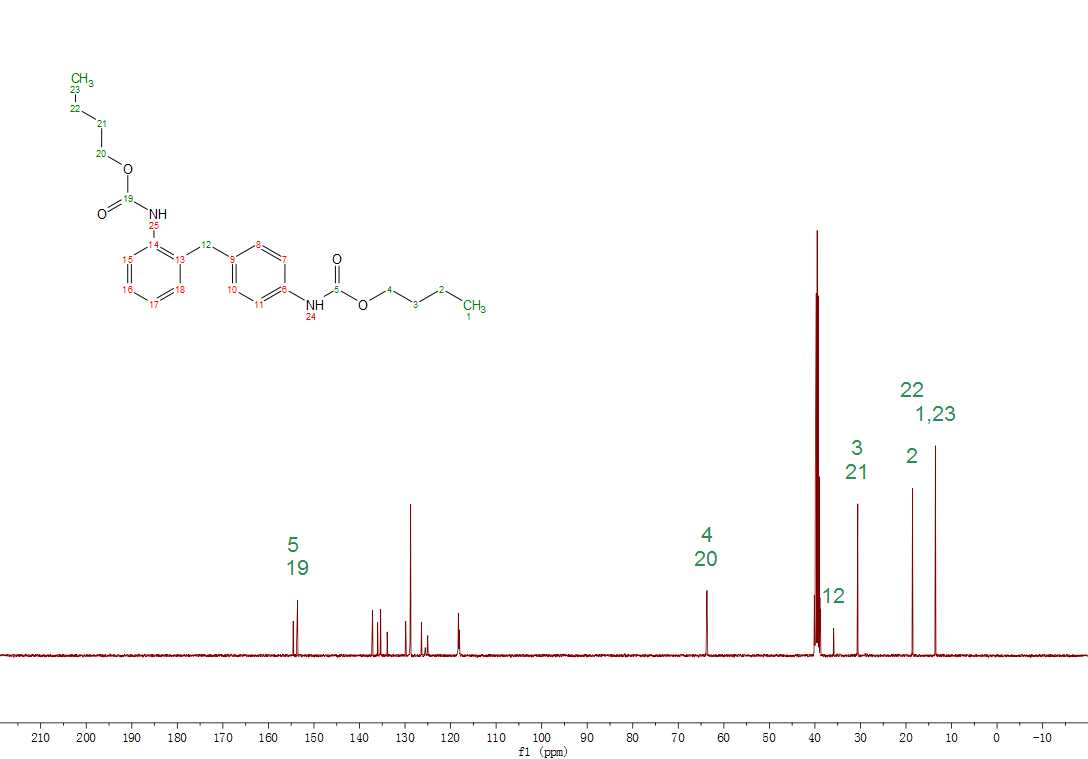
**

**Figure S7. 13C NMR spectrum of MDI-50_BO**

**
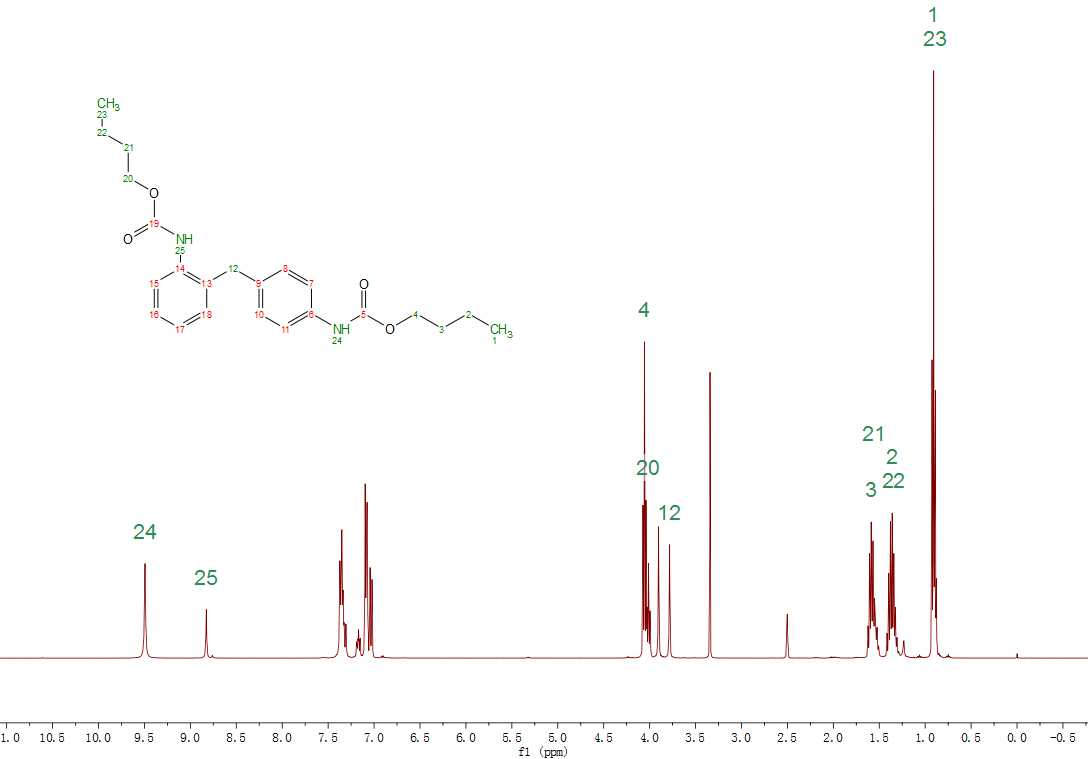
**

**Figure S8. 1H NMR spectrum of MDI-50_BO**

Compared with the structure of the 4,4-MDIBO (Figure 1), the structure of the 2,4-MDI_BO in MDI-50 is asymmetric. Although its 1H and 13C NMR spectra are a bit complex, it is also easy to be identified.

In the 13C NMR spectrum (Figure S7), the peaks at δC14.04 attributes to two methyl carbons (C-1 and C-23) whose absorption peaks overlap. The peaks at δC19.03 and δC19.07 were assigned to two methylene carbons (C-2 and C-22), respectively. The peaks at δC31.08 and δC31.18 were assigned to two methylene carbons (C-3 and C-21). The peak at δC36.38 belongs to the methylene carbon(C-12) which is between two benzene rings. The peaks at δC64.20 and δC64.26 belong to two methylene carbons (C-4 and C-20) which connects to oxygen. The peaks at δC118.59, δC118.79, δC125.52, δC126.07, δC126.88, δC129.27, δC129.33, δC130.35, δC134.43, δC135.85, δC136.51 and δC137.62 belong to twelve carbons on two benzene rings (C-7, C-8, C-10, C-11, C-15, C-16, C-17 and C-18). δC154.1 and the peaks at δC155.06 belong to two carbonyl carbon (C-5 and C-19).

In the 1H NMR spectrum (Figure S8), the two overlapping triplet peaks in the range of δH0.88～0.93 were attributed to two methyls (H-1and H-23). The two overlapping multiple peaks in the range of δH1.31～1.42 were assigned to two methylenes (H-2 and H-22). The two overlapping multiple peaks in the range of δH1.53～1.63 were assigned to two methylenes (H-3 and H-21). The two doublets appeared at δH3.79 and δH3.91, respectively, belong to two hydrogen atoms of the methylene (H-12) which is between the two benzene rings. Because of the asymmetry of 2,4-MDIBO structure, the space environment of the two hydrogen atoms in the methylene (H-12) is different and their chemical shifts are different either. The two  triplet peaks in the range of δH4.0～4.08 belong to two groups of methylenes (H-4 and H-20) which are connected with oxygen. The peaks in the range of δH7.03～7.48 belong to eight hydrogen atoms on two benzene rings. Two single peaks at δH8.83 and δH9.50 belong to the hydrogen atoms (H-24 and H-25) attached to nitrogen atom. All NMR analytical data of 2,4-MDI_BO are listed in the Table 4 in the text

**3) 13C and 1H NMR spectra of HDI_BO**

**
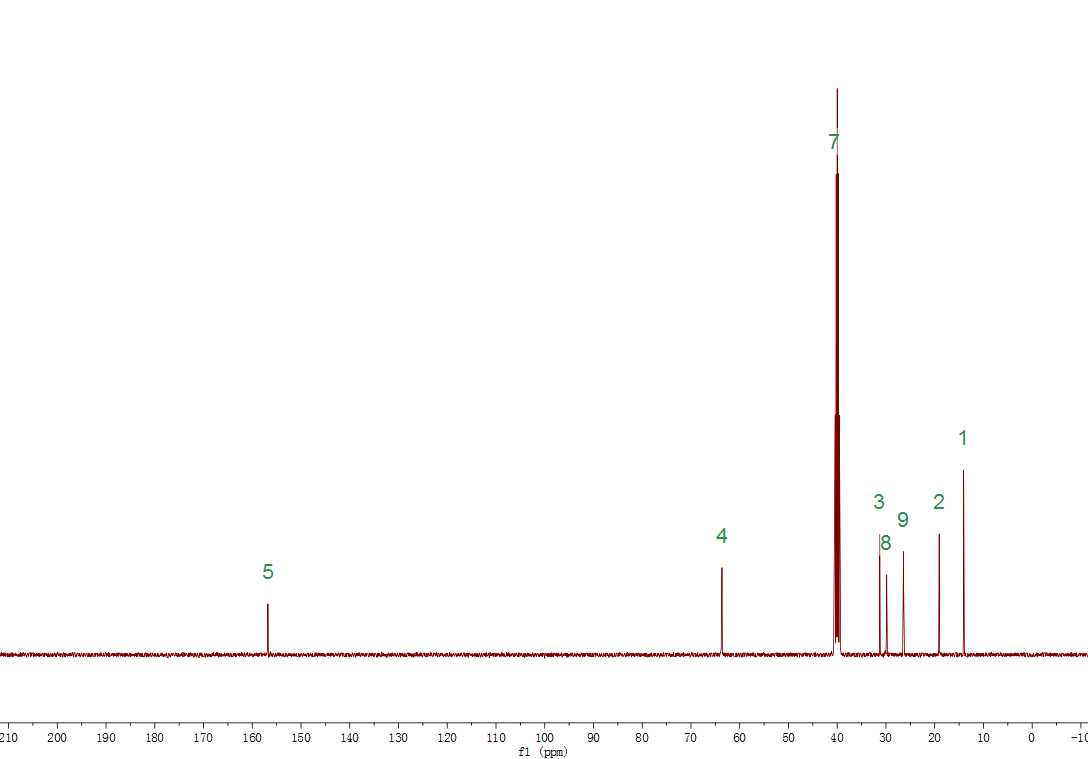
**

**Figure S9. 13C NMR spectrum of HDI_BO**

**
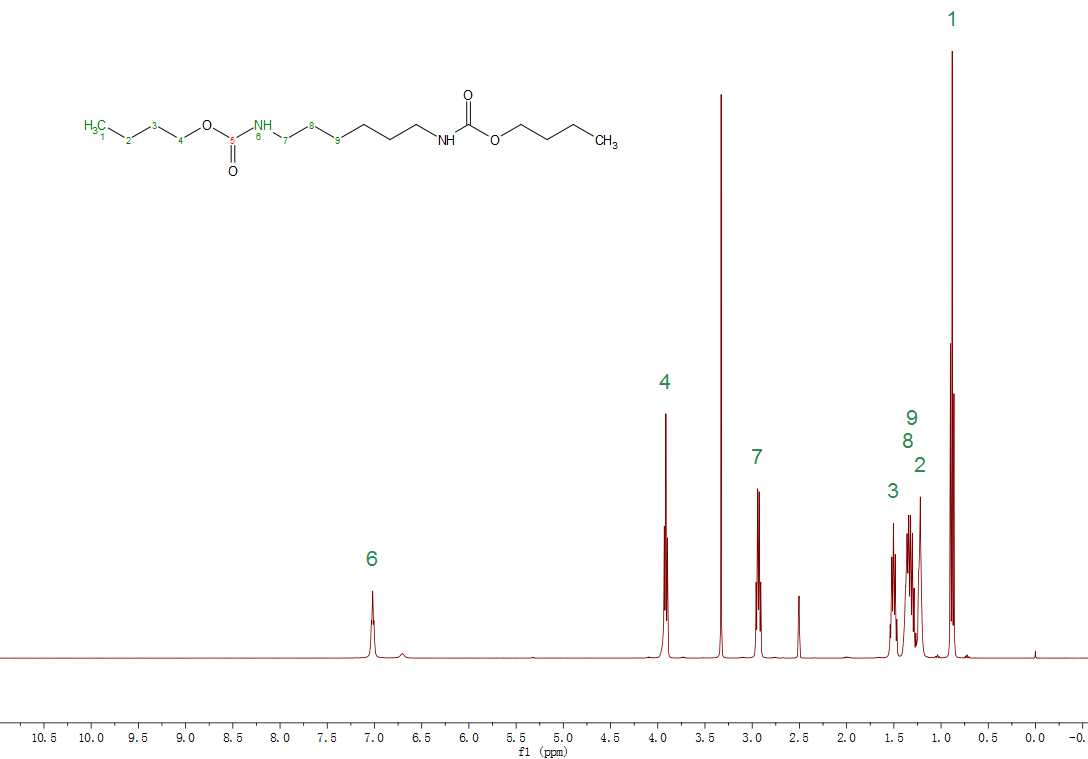
**

**Figure S10. 1H NMR spectrum of HDI_BO**

HDI-BO is symmetrical structure (Figure 1), there are 8 groups of hydrogen peaks and 10 carbon peaks in 1H and 13C NMR spectra, which can be easily distinguished.

In the 13C NMR spectrum (Figure S9), the peak at δC14.04 was attributed to the methyl carbon (C-1). The peak at δC19.07 was assigned to the methylene carbon(C-2). The peak at δC31.27 was assigned to the methylene carbon(C-3). The peak at δC63.64 belongs to the methylene carbon (C-4) which is connected with oxygen. The peak at δC156.80 belongs to the carbonyl carbon(C-5). The peak at δC39.99 belongs to the methylene carbon (C-7) and is hidden in the solvent peak of DMSO, whose chemical shift is at the relatively lower field because it is adjacent to nitrogen atom. The peaks at δC29.85 and δC26.39 belong to two methylene carbons (C-8 and C-9), respectively.

In the 1H NMR spectrum (Figure S10), the triplet at δH0.88 was attributed to methyl (H-1). The multiple peaks in the range of δH1.29～1.36 were assigned to two methylenes (H-2 and H-8) whose chemical shifts are too close to overlap together. The multiple peaks at δH1.51 were assigned to the methylene (H-3). The triplet peak at δH3.92 belongs to the methylene (H-4) which connect to oxygen. The triplet at δH7.02 belongs to the hydrogen attached to nitrogen atom, which is divided into the triplet peaks because of the coupling of two hydrogen atoms on the methylene (H-7) linked to the nitrogen atom. The multiple peaks at δH2.94 belong to the methylene (H-7), whose chemical shift is at the relatively low field because of the electron withdrawing effect of the adjacent nitrogen atom. The multiple peaks at δH1.24 belongs to the methylene (H-9). All NMR analytical data of HDI-BO are listed in the Table 5.

**4) 13C and 1H NMR spectra of HMDI_BO**

**
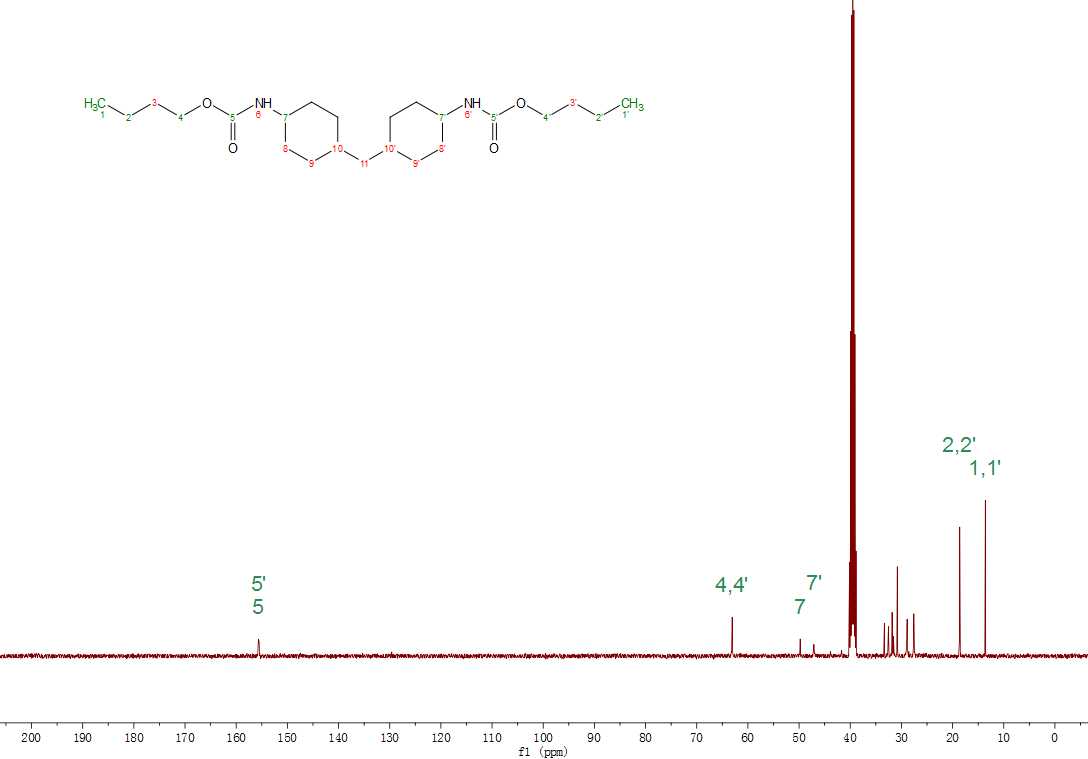
**

**Figure S11. 13C NMR spectrum of HMDI_BO**

**
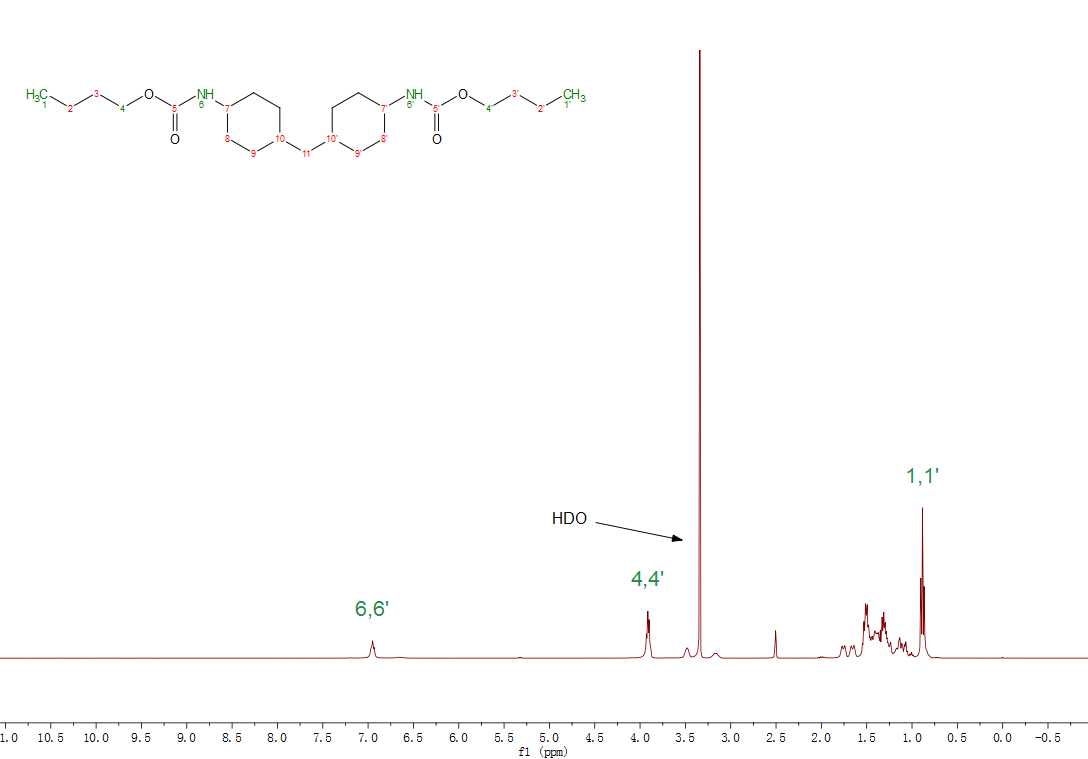
**

**Figure S12. 1H NMR spectrum of HMDI_BO**

In the HMDI-BO structure (Figure 1), there are two six-member rings of the cyclohexane. Because the six-member rings of the cyclohexane is not a planar ring, thus there exist two possible conformations, in which the seemingly symmetrical atoms is asymmetry in the spatial structure, which can also be verified from its 1H and 13C NMR spectra.

In the 13C NMR spectrum (Figure S11), the peak at δC14.02 was attributed to two methyl carbons (C-1 and C-1’). The peak at δC19.09 was assigned to two methylene carbons (C-2 and C-2’). The peaks at δC28.00, δC28.07, δC29.37, δC31.29, δC32.04, δC32.26, δC32.31, δC33.02 and δC33.81 were assigned to (C-3, C-3’ and C-11) and the carbons on two cyclohexanes (C-8, C-8’, C-9, C-9’, C-10 and C-10’), altogether nine carbons. The peaks at δC57.27 andδC47.57 belong to two carbons (C-7 and C7’) which are connected with nitrogen atom. The peak at δC63.56 belongs to two methylene carbons (C-4 and C-4’) which are adjacent to oxygen atom. The peaks at δC156.01 and δC156.15 belong to two carbonyl carbons (C-5 and C-5’). The chemical shift difference between C-5 and C-5’ or between C-7 and C7’ also proves that the spatial structure of HMDI-BO is asymmetry.

In the 1H NMR spectrum (Figure S12), the multiple peaks in the range of δH0.88～0.90 were attributed to two methyl groups (H-1 and H-1’). The absorption peaks overlap each other and is difficult to be identified one by one in the range of δH1.05～1.75, which were assigned to several groups of methylene hydrogen atoms (H-2, H-2’, H-3, H-3’ and H-11) and the hydrogen atoms on two cyclohexane rings (H-8, H-8’, H-9, H-9’, H-10 and H-10’). The multiple peaks at δH6.93 were assigned to the hydrogen atoms attached to nitrogen atom (H-6 and H-6’). In H-HCOSY spectrum (Figure S13), the peak at δH6.93 is related to δH3.17 and δH3.48, respectively, so the peaks at δH3.17 and δH3.48 belong to two groups of methine (H-7 and H-7’) which are connected with nitrogen atom. This result proves that the spatial structure of HMDI-BO is asymmetry. The peaks in the range of δH3.89～3.93 belong to two methylene groups (H-4 and H-4’) which are attached to oxygen atom. All NMR analytical data of HMDI-BO are listed in Table 6 in the text.

**3. X-ray figures**


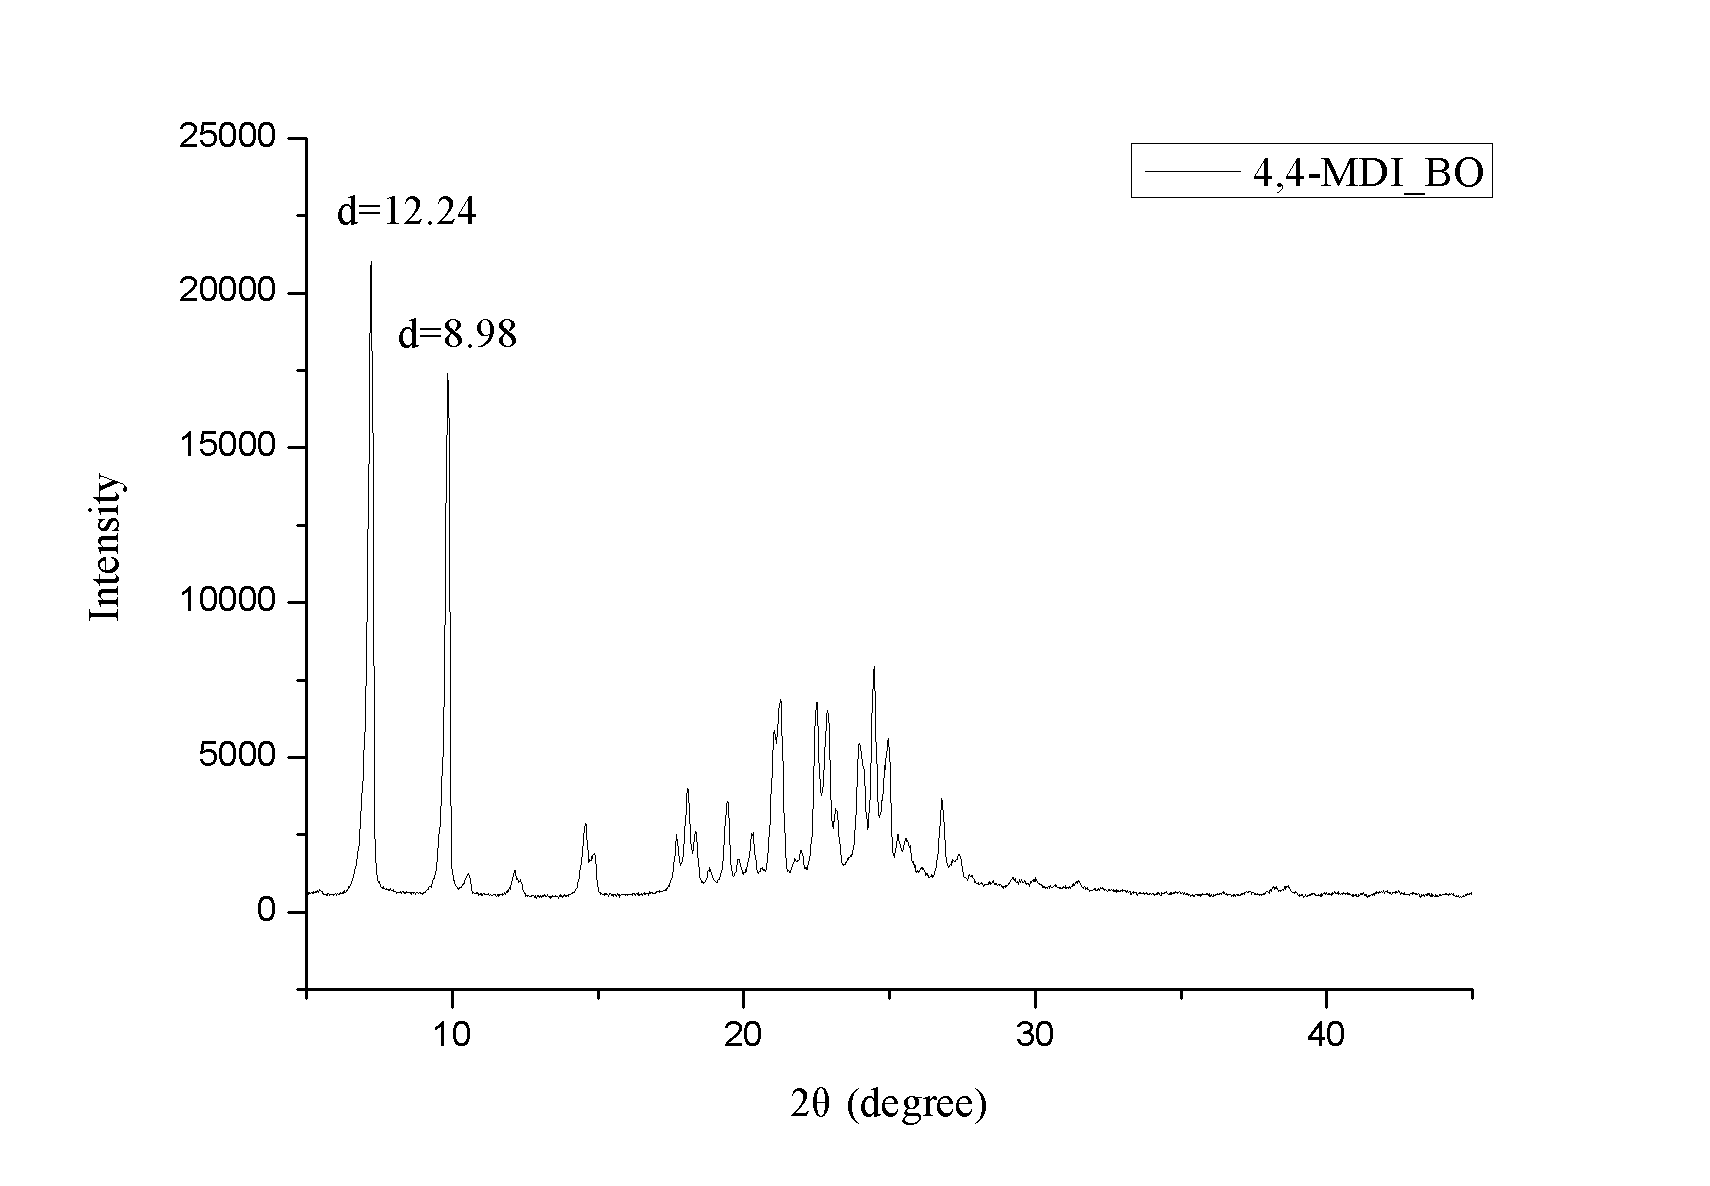


**Figure S13. X-ray spectrumof 4,4-MDI_BO**


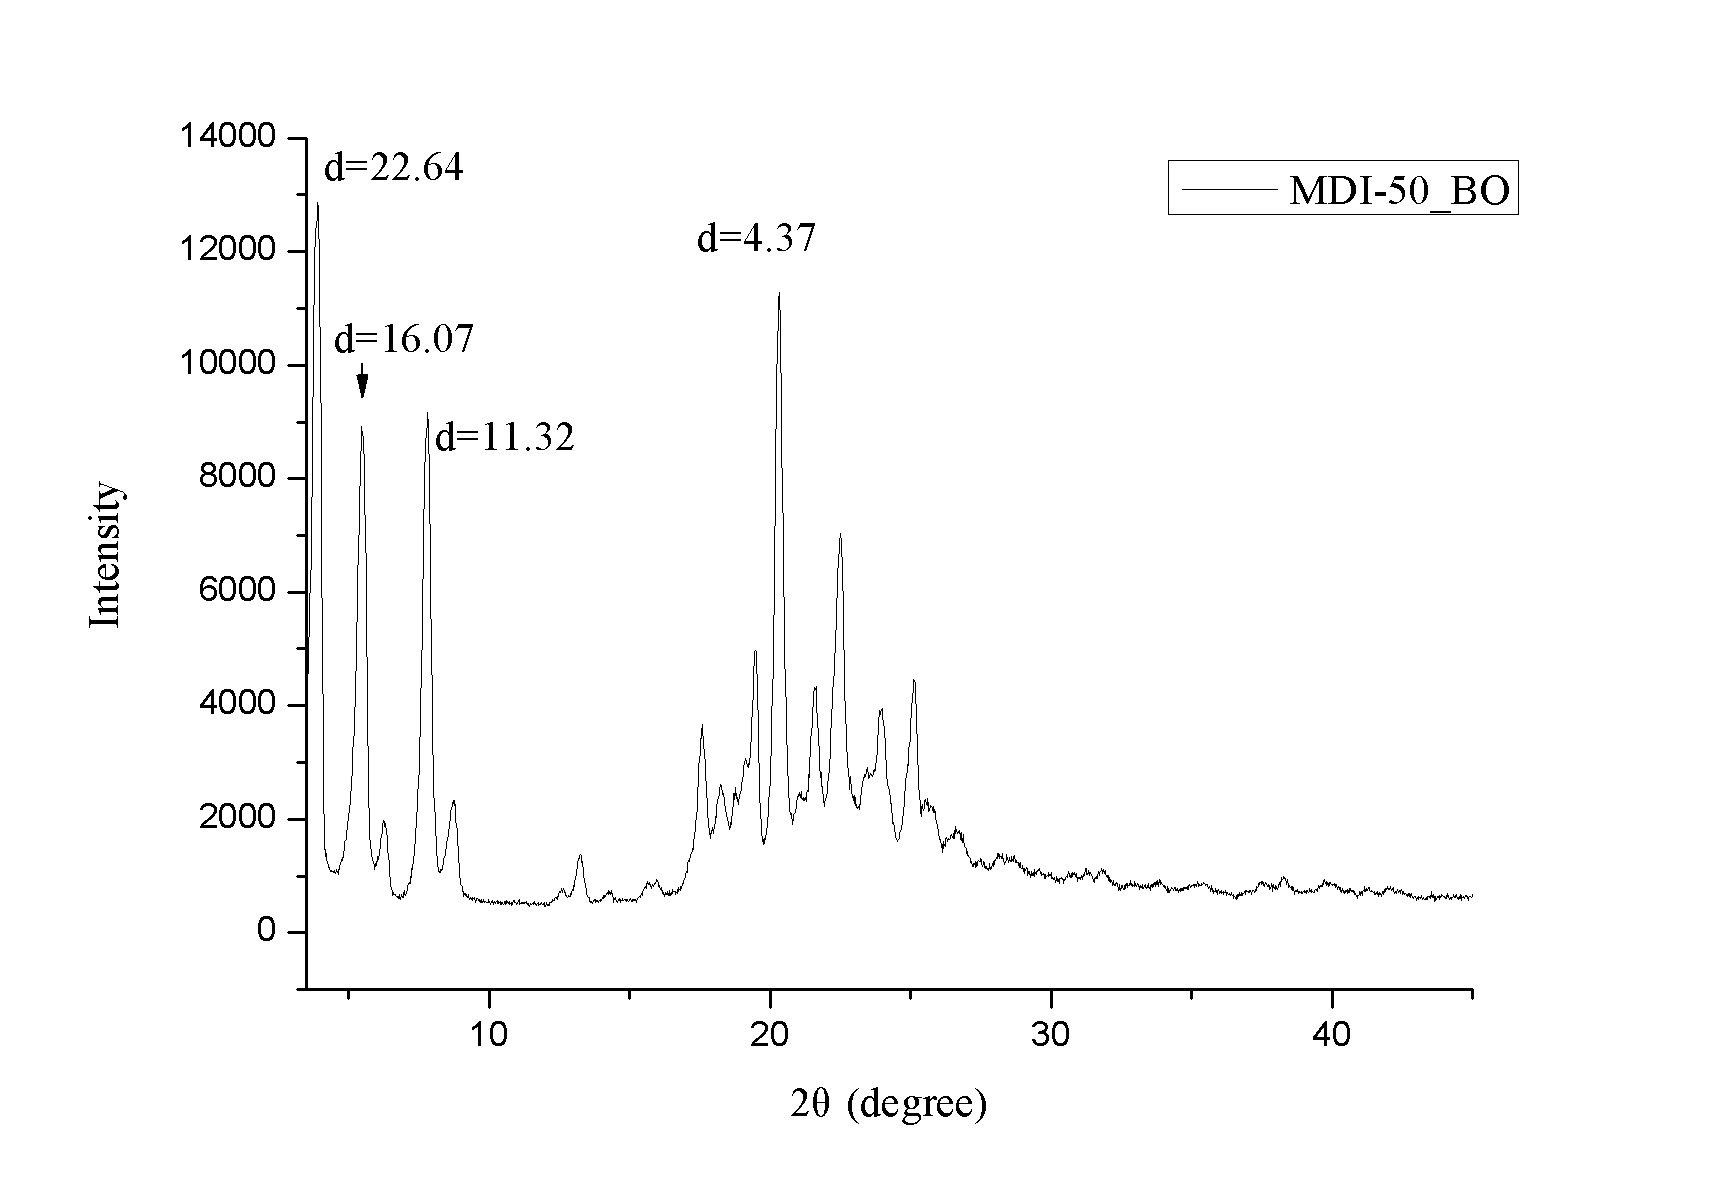


**Figure S14. X-ray spectrumof MDI-50_BO**


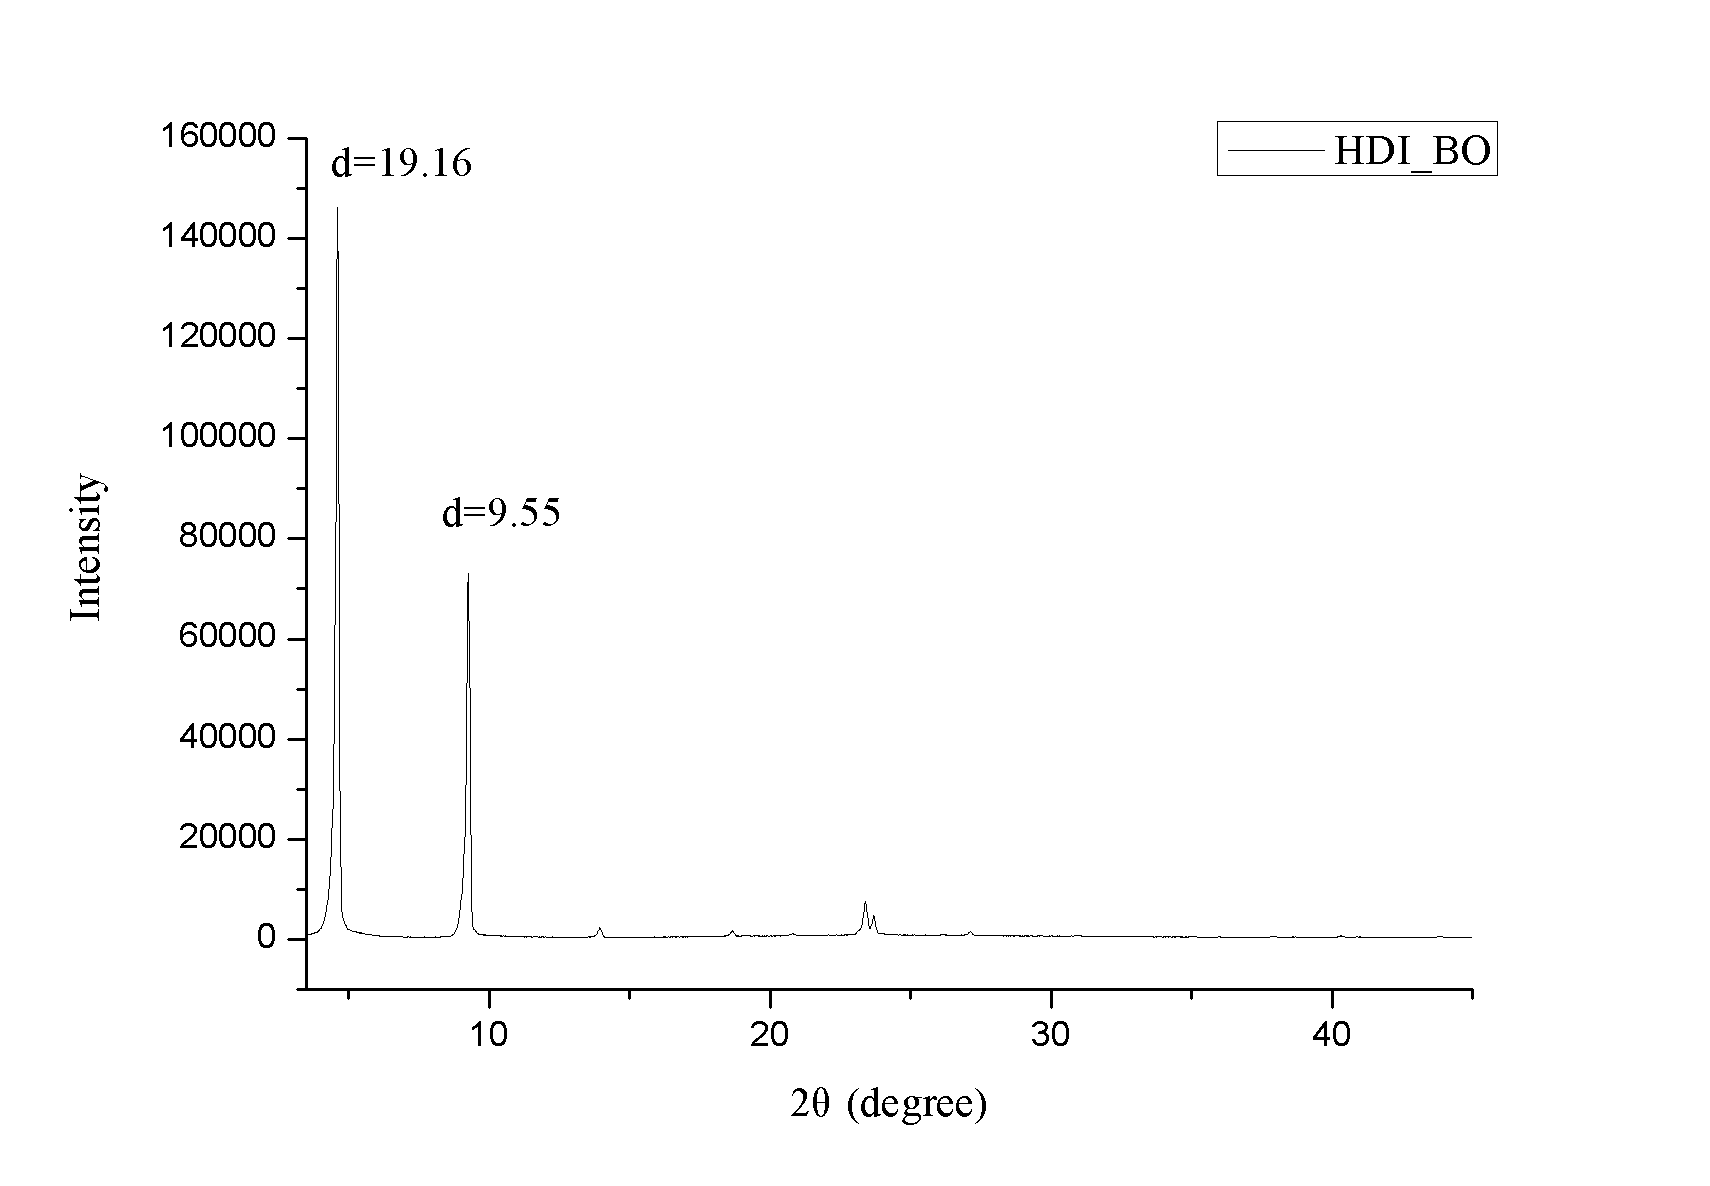


**Figure S15. X-ray spectrumof HDI_BO**


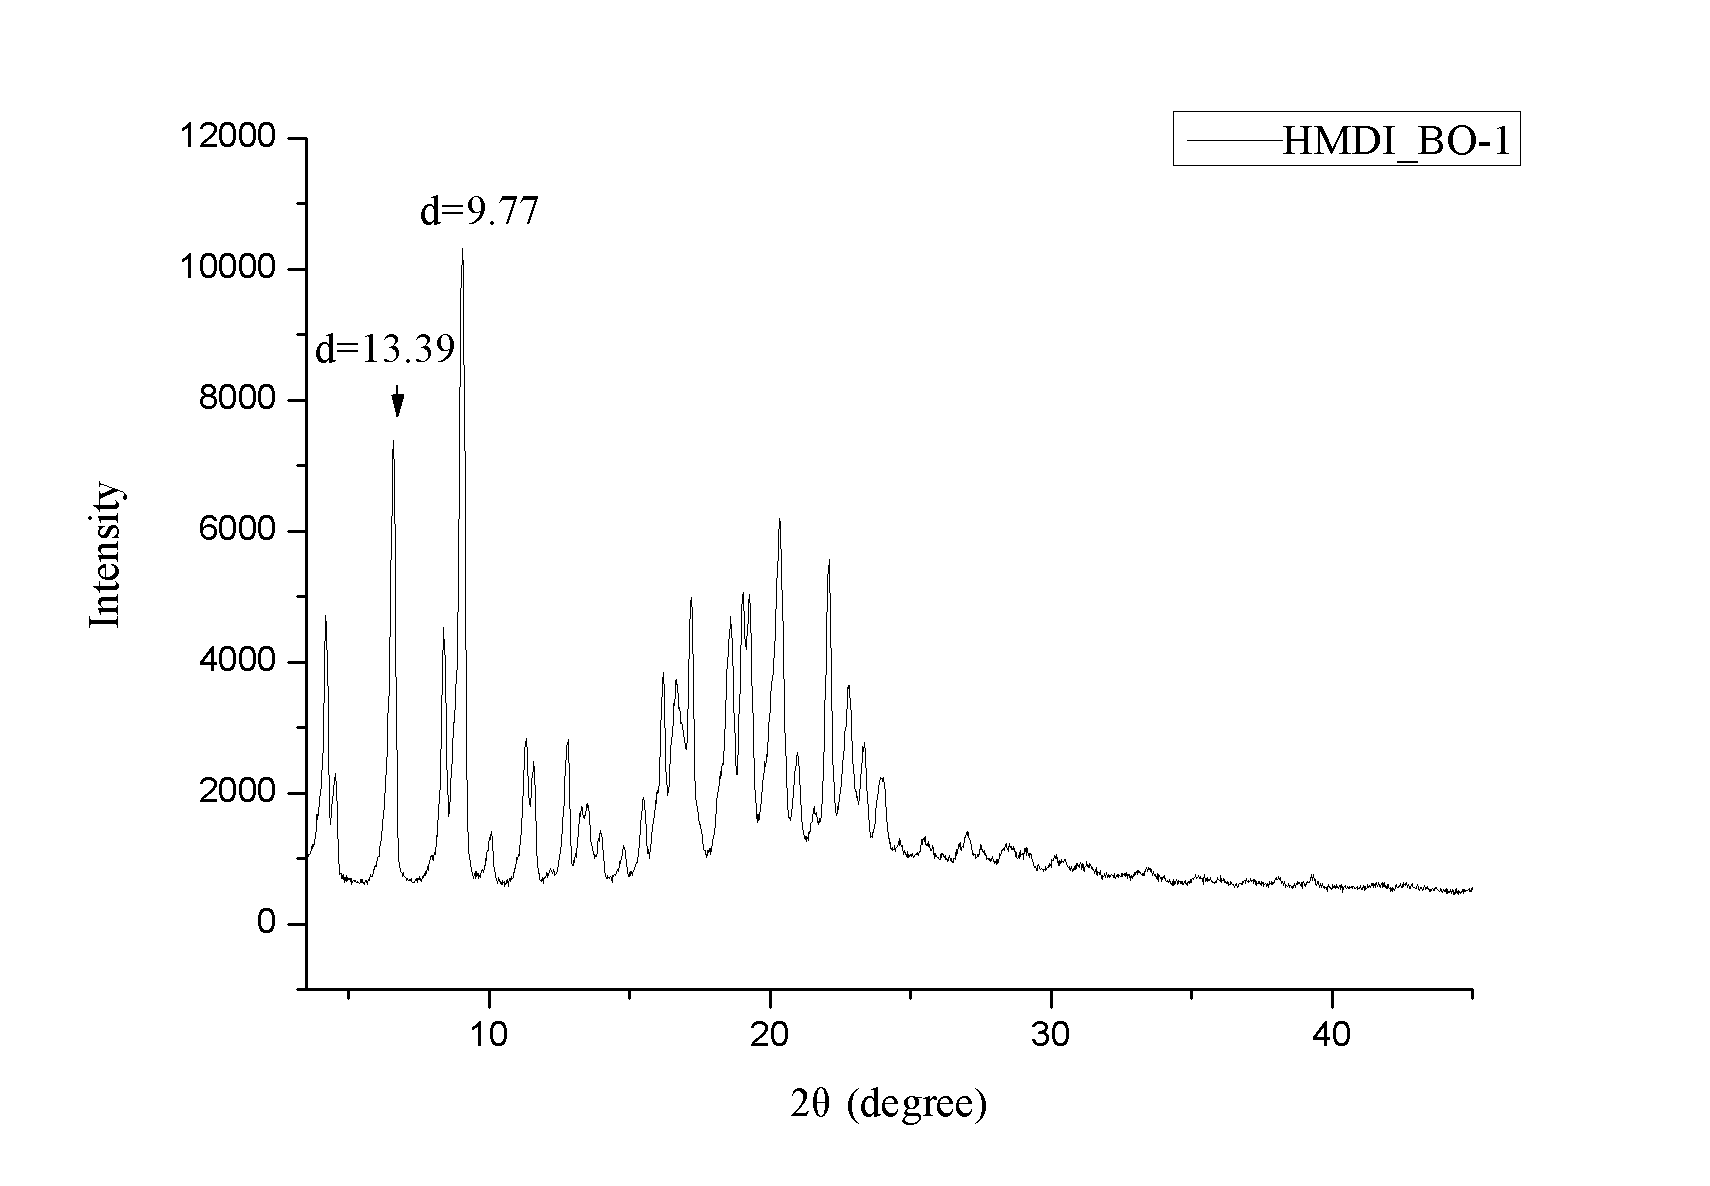


**Figure S16. X-ray spectrumof HMDI_BO-1**
